# Supplementary material for: Estimating an EQ-5D-3L Value Set for Romania Using Time Trade-Off
Source: MDPI journal article supplement (doi:10.3390/ijerph18147415), 2021-07-11
Supplement: s1 [file s1]

**Table S1.** Respondents' characteristics – categorical variables, dataset V1

| Variable        | Category              | V1 (n=1649) |       | Weighted V1 (n=1649) |       | General population |
|-----------------|-----------------------|-------------|-------|----------------------|-------|--------------------|
|                 |                       | n           | %     | n                    | %     | %                  |
| MO              | No problems           | 1371        | 83.1  | 1333                 | 80.83 |                    |
|                 | Some problems         | 374         | 16.62 | 302                  | 18.88 | N/A                |
|                 | Confined to bed       | 4           | 0.24  | 5                    | 0.28  |                    |
| SC              | No problems           | 1512        | 91.69 | 1474                 | 89.40 | N/A                |
|                 | Some problems         | 133         | 8.07  | 170                  | 10.32 |                    |
|                 | Unable                | 4           | 0.24  | 5                    | 0.28  |                    |
| UA              | No problems           | 1396        | 84.66 | 1348                 | 81.74 |                    |
|                 | Some problems         | 242         | 14.68 | 288                  | 17.44 | N/A                |
|                 | Unable                | 11          | 0.67  | 13                   | 0.82  |                    |
| PD              | No problems           | 1206        | 73.14 | 1179                 | 71.50 |                    |
|                 | Some problems         | 438         | 26.56 | 464                  | 28.12 | N/A                |
|                 | Extreme problems      | 5           | 0.30  | 6                    | 0.38  |                    |
| AD              | No problems           | 1360        | 82.47 | 1347                 | 81.71 |                    |
|                 | Some problems         | 241         | 14.61 | 257                  | 15.58 | N/A                |
|                 | Extreme problems      | 48          | 2.91  | 45                   | 2.71  |                    |
| Gender          | Female                | 1072        | 65.01 | 857                  | 51.99 | 52%                |
| Residence area  | Urban                 | 1212        | 73.50 | 895                  | 54.28 | 55.20%             |
| Education level | No formal education   | 7           | 0.42  | 13                   | 0.82  | 2%                 |
|                 | Low                   | 192         | 11.64 | 255                  | 15.46 | 36.90%             |
|                 | Medium                | 830         | 50.33 | 877                  | 53.21 | 45.20%             |
|                 | Tertiary              | 611         | 37.05 | 494                  | 29.95 | 15.90%             |
|                 | No response           | 9           | 0.55  | 9                    | 0.56  |                    |
| Occupation      | Employed              | 973         | 59.01 | 867                  | 52.55 | 52.10%             |
|                 | Unemployed            | 35          | 2.12  | 54                   | 3.29  | 3.90%              |
|                 | Retired               | 415         | 25.17 | 442                  | 26.79 | 26.20%             |
|                 | Stay at home/domestic | 117         | 7.10  | 147                  | 8.91  | 7.10%              |
|                 | In education          | 92          | 5.58  | 111                  | 6.72  | 4.80%              |
|                 | No response           | 17          | 1.03  | 28                   | 1.73  |                    |
| Income          | Below the average     | 705         | 42.75 | 773                  | 46.86 | 41.39%             |
|                 | Average               | 298         | 18.07 | 278                  | 16.83 | 30.75%             |
|                 | Above the average     | 513         | 31.11 | 447                  | 27.10 | 27.86%             |
|                 | No response           | 133         | 8.07  | 152                  | 9.21  |                    |

V1 Dataset contains all valid responses and corresponds to exclusion criterion (interviews of suspect quality performed by interviewers that were excluded from the team of interviewers due to non-compliance).

**Table S2.** All models that were tested.

| Model | Consistency of parameters achieved | Non-Significant parameters |
|-------|------------------------------------|----------------------------|
| OLS   | Yes                                | MO2                        |
| ROLS  | Yes                                | 0                          |
| RME   | Yes                                | MO2                        |

|          |     |               |
|----------|-----|---------------|
| IME      | Yes | MO2; constant |
| TOB      | Yes | MO2           |
| TOBRME   | Yes | MO2           |
| IRM      | Yes | 0             |
| IRMC     | Yes | 0             |
| IRMC RME | Yes | MO2           |
| IRMCIME  | Yes | MO2; constant |
| RCM      | Yes | MO2           |

OLS, ordinary least-squares; ROLS, robust ordinary least-squares; RME, respondent-level mixed effects; IME, interviewer-level mixed effects; TOB, tobit; TOBRME, tobit with respondent-level mixed effects; IRM, interval regression model; IRMC, interval regression model censored at -1; IRMC RME, interval regression model censored at -1 with respondent-level mixed effects; IRMCIME, interval regression model censored at -1 with interviewer-level mixed effects; RCM, random coefficient model.

**Table S3.** Full value set model for the Romanian version of EQ-5D-3L.

| <b>Independent<br/>variables of the model</b> | <b>Coefficient</b> | <b>SE</b> | <b>p-value</b> | <b>95% CI</b> |        |
|-----------------------------------------------|--------------------|-----------|----------------|---------------|--------|
| (Constant)                                    | 0.032              | 0.005     | 0.000          | 0.022         | 0.042  |
| MO2                                           | 0.038              | 0.005     | 0.000          | 0.027         | 0.048  |
| MO3                                           | 0.394              | 0.013     | 0.000          | 0.369         | 0.420  |
| SC2                                           | 0.040              | 0.006     | 0.000          | 0.029         | 0.052  |
| SC3                                           | 0.206              | 0.010     | 0.000          | 0.187         | 0.225  |
| UA2                                           | 0.044              | 0.005     | 0.000          | 0.034         | 0.055  |
| UA3                                           | 0.189              | 0.011     | 0.000          | 0.167         | 0.212  |
| PD2                                           | 0.072              | 0.006     | 0.000          | 0.060         | 0.083  |
| PD3                                           | 0.371              | 0.012     | 0.000          | 0.348         | 0.394  |
| AD2                                           | 0.054              | 0.006     | 0.000          | 0.042         | 0.065  |
| AD3                                           | 0.206              | 0.010     | 0.000          | 0.187         | 0.224  |
| <b>Model for lnsigma</b>                      |                    |           |                |               |        |
| (Constant)                                    | -2.256             | 0.028     | 0.000          | -2.312        | -2.201 |
| MO2                                           | -0.060             | 0.025     | 0.019          | -0.109        | -0.010 |
| MO3                                           | 0.560              | 0.027     | 0.000          | 0.507         | 0.613  |
| SC2                                           | 0.045              | 0.027     | 0.091          | -0.007        | 0.098  |
| SC3                                           | 0.416              | 0.028     | 0.000          | 0.361         | 0.472  |
| UA2                                           | 0.009              | 0.027     | 0.730          | -0.044        | 0.062  |
| UA3                                           | 0.357              | 0.027     | 0.000          | 0.304         | 0.410  |
| PD2                                           | 0.148              | 0.027     | 0.000          | 0.095         | 0.201  |
| PD3                                           | 0.591              | 0.027     | 0.000          | 0.538         | 0.643  |
| AD2                                           | 0.144              | 0.026     | 0.000          | 0.092         | 0.195  |
| AD3                                           | 0.599              | 0.027     | 0.000          | 0.548         | 0.651  |

**Table S4.** Predicted values for the EQ-5D-3L – Romanian model (RO model)

| <b>State</b> | <b>RO model</b> |
|--------------|-----------------|--------------|-----------------|--------------|-----------------|--------------|-----------------|
| 11111        | 1.000           | 12211        | 0.883           | 13311        | 0.572           | 22111        | 0.890           |
| 11112        | 0.914           | 12212        | 0.829           | 13312        | 0.518           | 22112        | 0.836           |
| 11113        | 0.762           | 12213        | 0.677           | 13313        | 0.367           | 22113        | 0.684           |
| 11121        | 0.896           | 12221        | 0.811           | 13321        | 0.501           | 22121        | 0.818           |
| 11122        | 0.842           | 12222        | 0.757           | 13322        | 0.447           | 22122        | 0.764           |
| 11123        | 0.691           | 12223        | 0.606           | 13323        | 0.295           | 22123        | 0.612           |
| 11131        | 0.596           | 12231        | 0.512           | 13331        | 0.201           | 22131        | 0.518           |
| 11132        | 0.542           | 12232        | 0.458           | 13332        | 0.147           | 22132        | 0.464           |
| 11133        | 0.391           | 12233        | 0.306           | 13333        | -0.005          | 22133        | 0.313           |
| 11211        | 0.923           | 12311        | 0.738           | 21111        | 0.930           | 22211        | 0.845           |
| 11212        | 0.870           | 12312        | 0.684           | 21112        | 0.876           | 22212        | 0.791           |
| 11213        | 0.718           | 12313        | 0.532           | 21113        | 0.724           | 22213        | 0.640           |
| 11221        | 0.852           | 12321        | 0.666           | 21121        | 0.858           | 22221        | 0.774           |
| 11222        | 0.798           | 12322        | 0.612           | 21122        | 0.804           | 22222        | 0.720           |
| 11223        | 0.646           | 12323        | 0.461           | 21123        | 0.653           | 22223        | 0.568           |
| 11231        | 0.552           | 12331        | 0.366           | 21131        | 0.559           | 22231        | 0.474           |
| 11232        | 0.498           | 12332        | 0.312           | 21132        | 0.505           | 22232        | 0.420           |
| 11233        | 0.347           | 12333        | 0.161           | 21133        | 0.353           | 22233        | 0.268           |
| 11311        | 0.778           | 13111        | 0.762           | 21211        | 0.886           | 22311        | 0.700           |
| 11312        | 0.724           | 13112        | 0.708           | 21212        | 0.832           | 22312        | 0.646           |
| 11313        | 0.573           | 13113        | 0.556           | 21213        | 0.680           | 22313        | 0.495           |
| 11321        | 0.707           | 13121        | 0.690           | 21221        | 0.814           | 22321        | 0.628           |
| 11322        | 0.653           | 13122        | 0.636           | 21222        | 0.760           | 22322        | 0.574           |
| 11323        | 0.501           | 13123        | 0.484           | 21223        | 0.609           | 22323        | 0.423           |
| 11331        | 0.407           | 13131        | 0.390           | 21231        | 0.514           | 22331        | 0.329           |
| 11332        | 0.353           | 13132        | 0.336           | 21232        | 0.461           | 22332        | 0.275           |
| 11333        | 0.201           | 13133        | 0.185           | 21233        | 0.309           | 22333        | 0.123           |
| 12111        | 0.927           | 13211        | 0.717           | 21311        | 0.741           | 23111        | 0.724           |
| 12112        | 0.873           | 13212        | 0.664           | 21312        | 0.687           | 23112        | 0.670           |
| 12113        | 0.722           | 13213        | 0.512           | 21313        | 0.535           | 23113        | 0.518           |
| 12121        | 0.856           | 13221        | 0.646           | 21321        | 0.669           | 23121        | 0.652           |
| 12122        | 0.802           | 13222        | 0.592           | 21322        | 0.615           | 23122        | 0.598           |
| 12123        | 0.650           | 13223        | 0.440           | 21323        | 0.463           | 23123        | 0.447           |
| 12131        | 0.556           | 13231        | 0.346           | 21331        | 0.369           | 23131        | 0.353           |
| 12132        | 0.502           | 13232        | 0.292           | 21332        | 0.315           | 23132        | 0.299           |
| 12133        | 0.350           | 13233        | 0.141           | 21333        | 0.164           | 23133        | 0.147           |

Predicted values for the EQ-5D-3L – Romanian model (continued)

| State | RO model | State | RO model | State | RO model |
|-------|----------|-------|----------|-------|----------|
| 23211 | 0.680    | 31311 | 0.384    | 33111 | 0.367    |
| 23212 | 0.626    | 31312 | 0.330    | 33112 | 0.314    |
| 23213 | 0.474    | 31313 | 0.179    | 33113 | 0.162    |
| 23221 | 0.608    | 31321 | 0.312    | 33121 | 0.296    |
| 23222 | 0.554    | 31322 | 0.258    | 33122 | 0.242    |
| 23223 | 0.403    | 31323 | 0.107    | 33123 | 0.090    |
| 23231 | 0.308    | 31331 | 0.013    | 33131 | -0.004   |
| 23232 | 0.254    | 31332 | -0.041   | 33132 | -0.058   |
| 23233 | 0.103    | 31333 | -0.193   | 33133 | -0.209   |
| 23311 | 0.534    | 32111 | 0.533    | 33211 | 0.323    |
| 23312 | 0.481    | 32112 | 0.479    | 33212 | 0.269    |
| 23313 | 0.329    | 32113 | 0.328    | 33213 | 0.118    |
| 23321 | 0.463    | 32121 | 0.461    | 33221 | 0.252    |
| 23322 | 0.409    | 32122 | 0.407    | 33222 | 0.198    |
| 23323 | 0.257    | 32123 | 0.256    | 33223 | 0.046    |
| 23331 | 0.163    | 32131 | 0.162    | 33231 | -0.048   |
| 23332 | 0.109    | 32132 | 0.108    | 33232 | -0.102   |
| 23333 | -0.042   | 32133 | -0.044   | 33233 | -0.254   |
| 31111 | 0.574    | 32211 | 0.489    | 33311 | 0.178    |
| 31112 | 0.520    | 32212 | 0.435    | 33312 | 0.124    |
| 31113 | 0.368    | 32213 | 0.283    | 33313 | -0.028   |
| 31121 | 0.502    | 32221 | 0.417    | 33321 | 0.106    |
| 31122 | 0.448    | 32222 | 0.363    | 33322 | 0.052    |
| 31123 | 0.296    | 32223 | 0.212    | 33323 | -0.099   |
| 31131 | 0.202    | 32231 | 0.118    | 33331 | -0.193   |
| 31132 | 0.148    | 32232 | 0.064    | 33332 | -0.247   |
| 31133 | -0.003   | 32233 | -0.088   | 33333 | -0.399   |
| 31211 | 0.529    | 32311 | 0.344    |       |          |
| 31212 | 0.475    | 32312 | 0.290    |       |          |
| 31213 | 0.324    | 32313 | 0.138    |       |          |
| 31221 | 0.458    | 32321 | 0.272    |       |          |
| 31222 | 0.404    | 32322 | 0.218    |       |          |
| 31223 | 0.252    | 32323 | 0.066    |       |          |
| 31231 | 0.158    | 32331 | -0.028   |       |          |
| 31232 | 0.104    | 32332 | -0.082   |       |          |
| 31233 | -0.048   | 32333 | -0.233   |       |          |

**Table S5.** Full RO model run on dataset V1

| <b>Independent variables of the model</b> | <b>Coefficient</b> | <b>SE</b> | <b>p-value</b> | <b>95% CI</b> |        |
|-------------------------------------------|--------------------|-----------|----------------|---------------|--------|
| <b>(Constant)</b>                         | 0.032              | 0.005     | 0.000          | 0.022         | 0.043  |
| MO2                                       | 0.037              | 0.006     | 0.000          | 0.026         | 0.048  |
| MO3                                       | 0.389              | 0.013     | 0.000          | 0.364         | 0.414  |
| SC2                                       | 0.044              | 0.006     | 0.000          | 0.032         | 0.056  |
| SC3                                       | 0.207              | 0.010     | 0.000          | 0.187         | 0.226  |
| UA2                                       | 0.043              | 0.005     | 0.000          | 0.032         | 0.054  |
| UA3                                       | 0.182              | 0.011     | 0.000          | 0.160         | 0.205  |
| PD2                                       | 0.069              | 0.006     | 0.000          | 0.057         | 0.080  |
| PD3                                       | 0.355              | 0.012     | 0.000          | 0.332         | 0.377  |
| AD2                                       | 0.054              | 0.006     | 0.000          | 0.042         | 0.065  |
| AD3                                       | 0.209              | 0.010     | 0.000          | 0.190         | 0.227  |
| <b>Model for Insigma</b>                  |                    |           |                |               |        |
| (Constant)                                | -2.208             | 0.027     | 0.000          | -2.262        | -2.155 |
| MO2                                       | -0.046             | 0.025     | 0.061          | -0.095        | 0.002  |
| MO3                                       | 0.535              | 0.026     | 0.000          | 0.484         | 0.587  |
| SC2                                       | 0.106              | 0.026     | 0.000          | 0.055         | 0.156  |
| SC3                                       | 0.428              | 0.028     | 0.000          | 0.374         | 0.482  |
| UA2                                       | -0.020             | 0.026     | 0.437          | -0.072        | 0.031  |
| UA3                                       | 0.343              | 0.026     | 0.000          | 0.292         | 0.394  |
| PD2                                       | 0.147              | 0.026     | 0.000          | 0.096         | 0.199  |
| PD3                                       | 0.577              | 0.026     | 0.000          | 0.526         | 0.629  |
| AD2                                       | 0.108              | 0.026     | 0.000          | 0.058         | 0.159  |
| AD3                                       | 0.560              | 0.026     | 0.000          | 0.509         | 0.610  |

**Table S6.** Full RO model run on weighted V3 dataset

| <b>Independent variables of the model</b> | <b>Coefficient</b> | <b>SE</b> | <b>p-value</b> | <b>95% CI</b> |        |
|-------------------------------------------|--------------------|-----------|----------------|---------------|--------|
| (Constant)                                | 0.039              | 0.006     | 0.000          | 0.027         | 0.050  |
| MO2                                       | 0.031              | 0.007     | 0.000          | 0.018         | 0.045  |
| MO3                                       | 0.416              | 0.019     | 0.000          | 0.379         | 0.453  |
| SC2                                       | 0.046              | 0.007     | 0.000          | 0.033         | 0.059  |
| SC3                                       | 0.228              | 0.017     | 0.000          | 0.196         | 0.261  |
| UA2                                       | 0.041              | 0.006     | 0.000          | 0.028         | 0.053  |
| UA3                                       | 0.183              | 0.015     | 0.000          | 0.154         | 0.212  |
| PD2                                       | 0.070              | 0.007     | 0.000          | 0.057         | 0.083  |
| PD3                                       | 0.359              | 0.016     | 0.000          | 0.328         | 0.390  |
| AD2                                       | 0.051              | 0.007     | 0.000          | 0.037         | 0.065  |
| AD3                                       | 0.200              | 0.012     | 0.000          | 0.177         | 0.224  |
| <b>Model for Insigma</b>                  |                    |           |                |               |        |
| (Constant)                                | -2.242             | 0.063     | 0.000          | -2.365        | -2.120 |
| MO2                                       | -0.073             | 0.073     | 0.320          | -0.216        | 0.071  |
| MO3                                       | 0.568              | 0.064     | 0.000          | 0.443         | 0.694  |
| SC2                                       | 0.094              | 0.049     | 0.054          | -0.002        | 0.190  |
| SC3                                       | 0.506              | 0.098     | 0.000          | 0.314         | 0.699  |
| UA2                                       | 0.045              | 0.065     | 0.491          | -0.083        | 0.173  |
| UA3                                       | 0.338              | 0.061     | 0.000          | 0.217         | 0.458  |
| PD2                                       | 0.143              | 0.068     | 0.036          | 0.009         | 0.277  |
| PD3                                       | 0.591              | 0.058     | 0.000          | 0.477         | 0.705  |
| AD2                                       | 0.063              | 0.073     | 0.392          | -0.081        | 0.206  |
| AD3                                       | 0.529              | 0.056     | 0.000          | 0.418         | 0.639  |
